# Supplementary material for: Neutrophil extracellular traps-triggered impaired autophagic flux via METTL3 underlies sepsis-associated acute lung injury
Source: PubMed Central journal article supplement (PMC9420153; doi:10.1038/s41420-022-01166-3), 2022-08-27

**Figure 1.G**

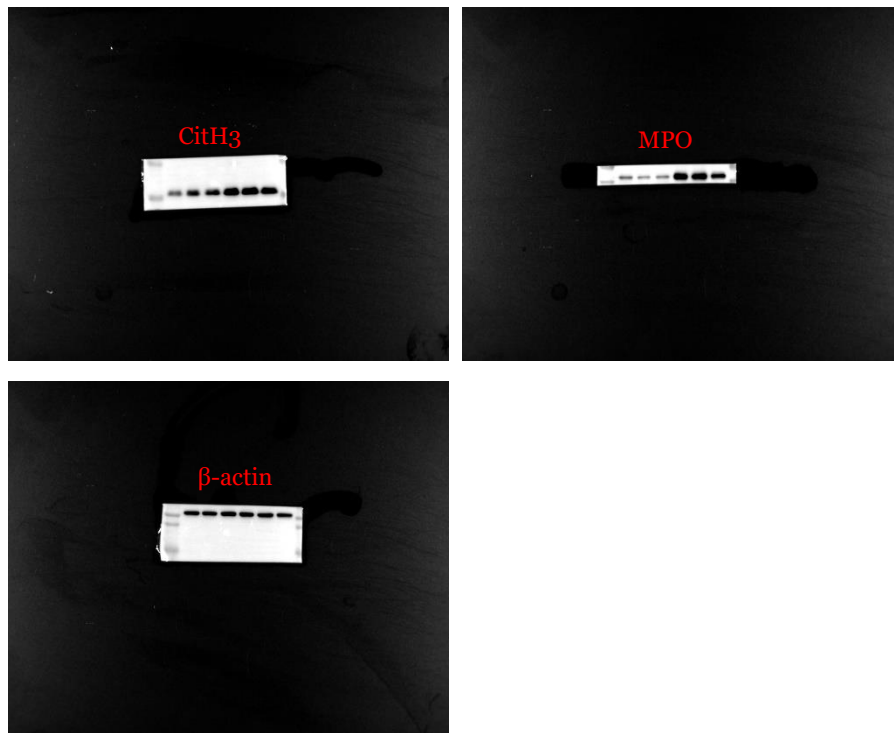

**Figure 3.C**

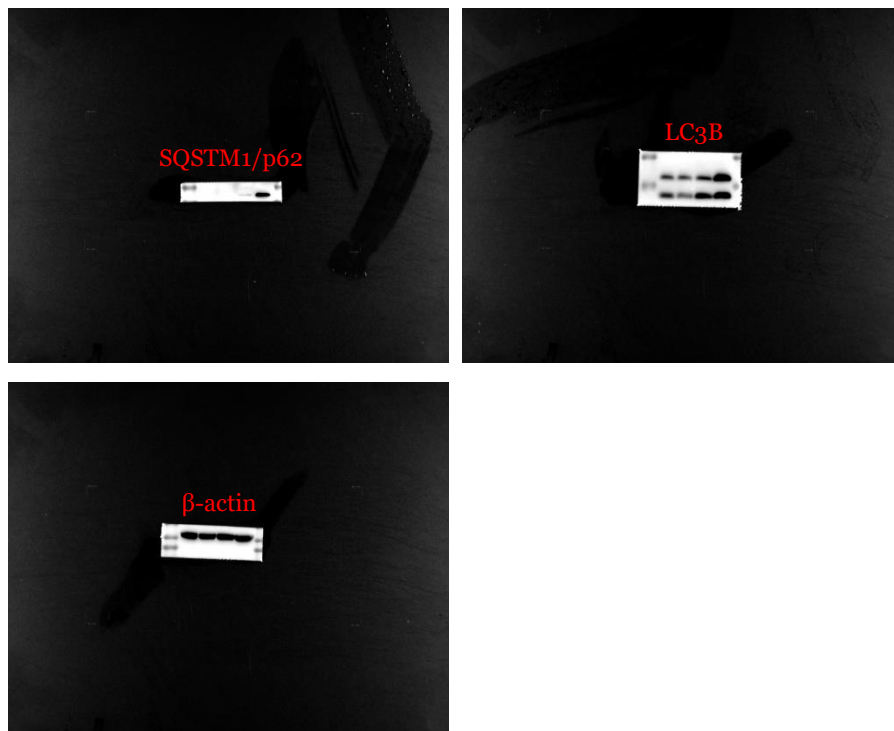

**Figure 3.F**

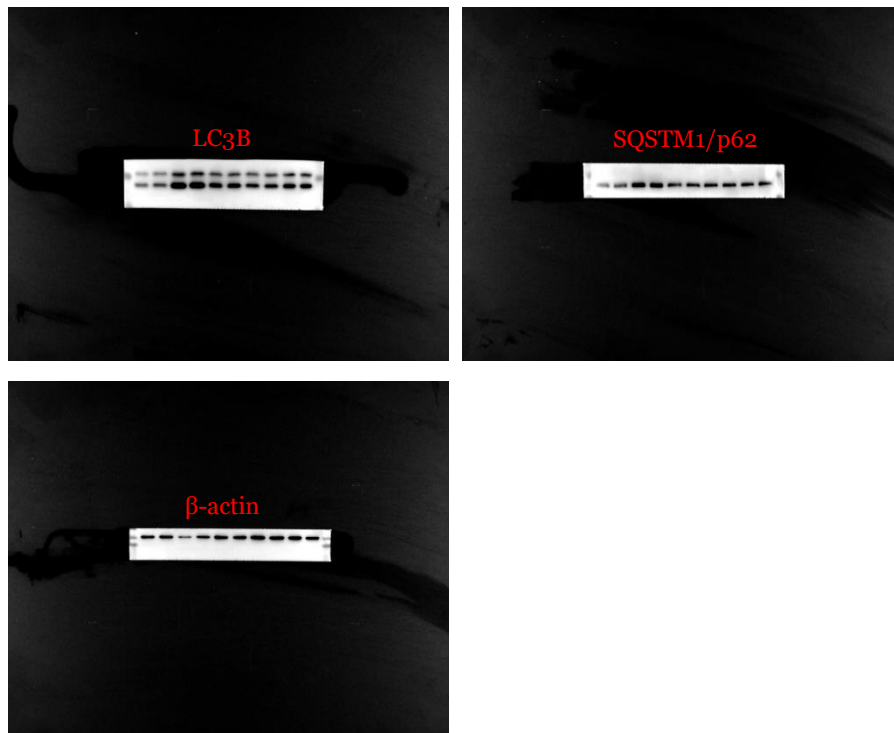

**Figure 4.D**

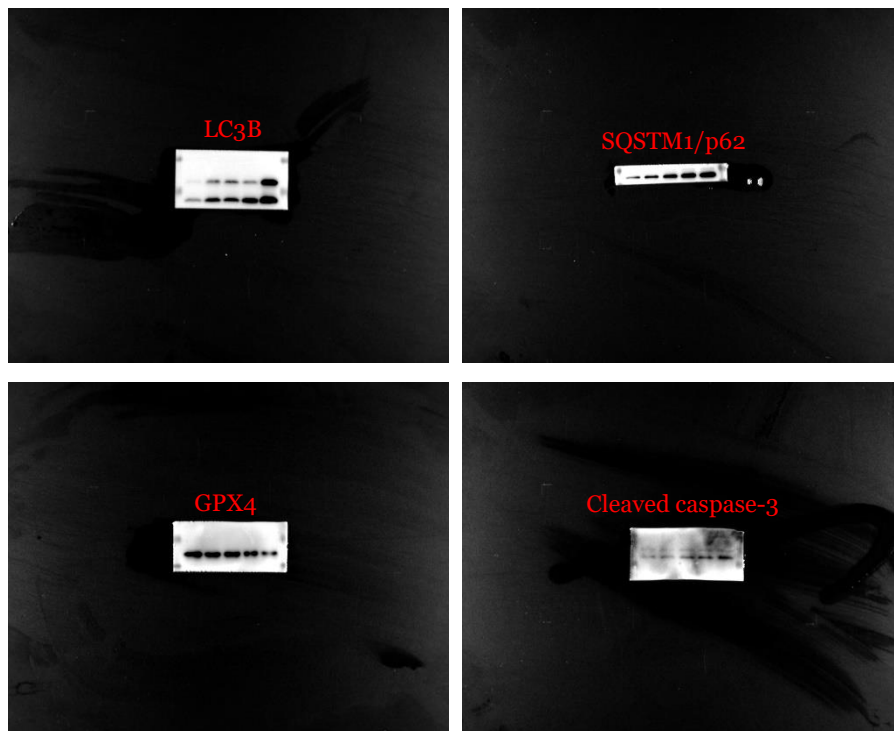

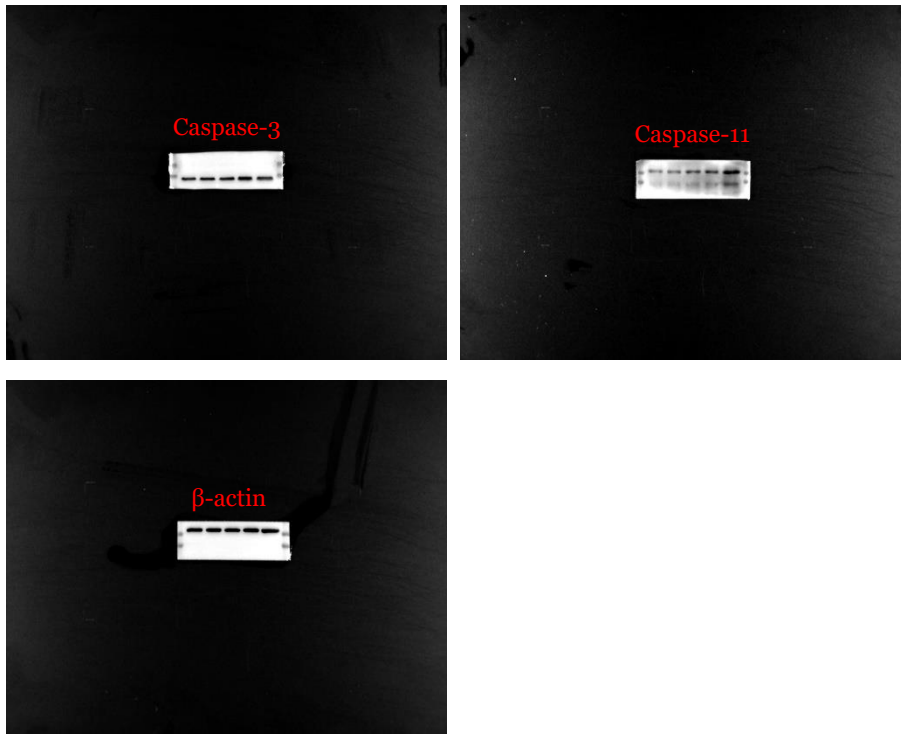

**Figure 5.B**

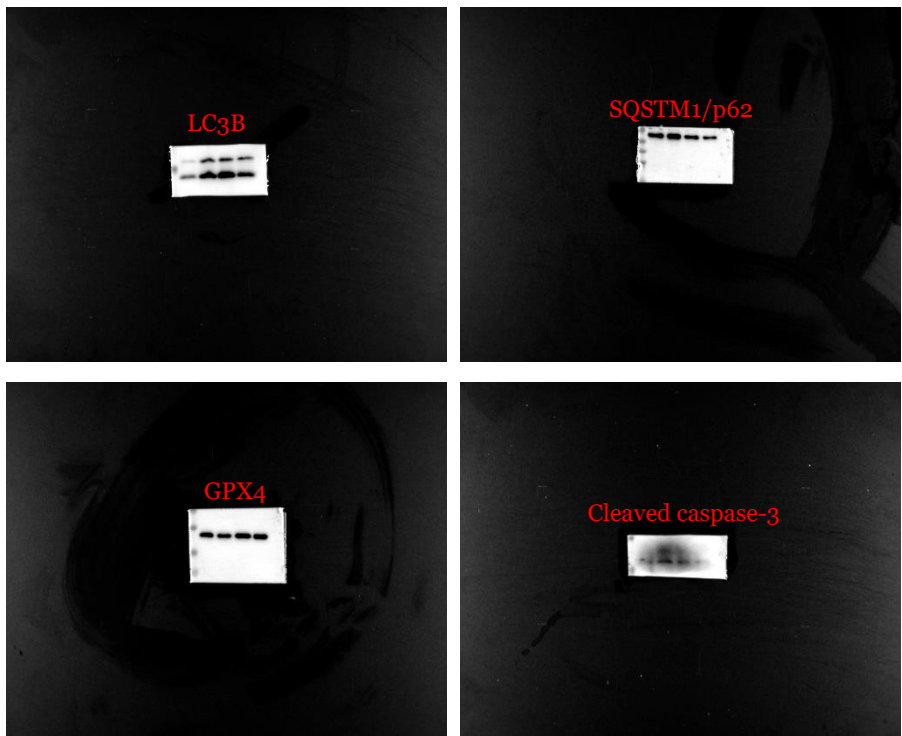

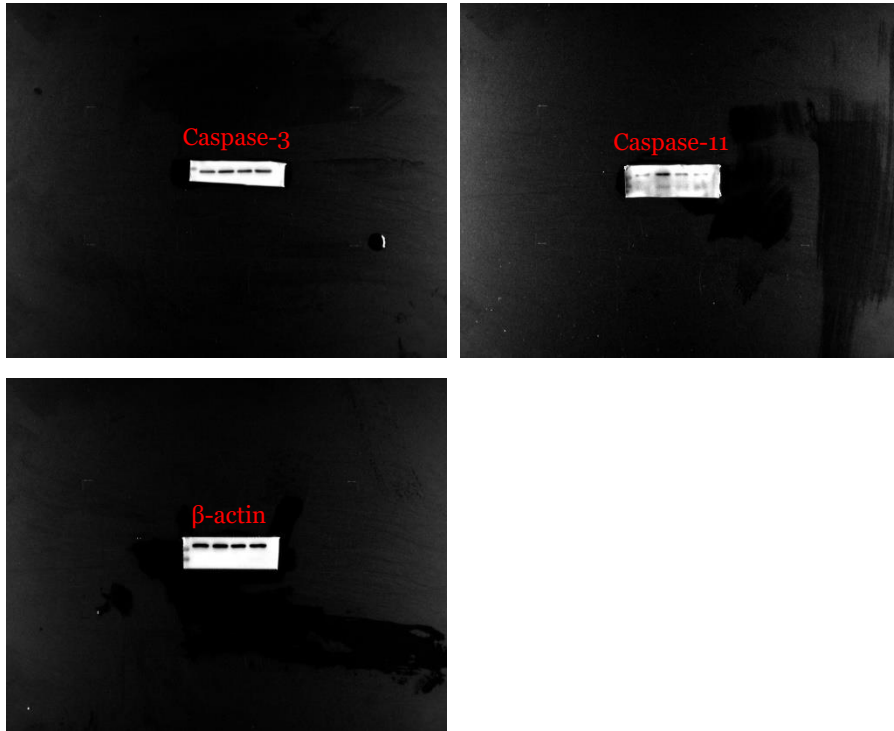

**Figure 5.D**

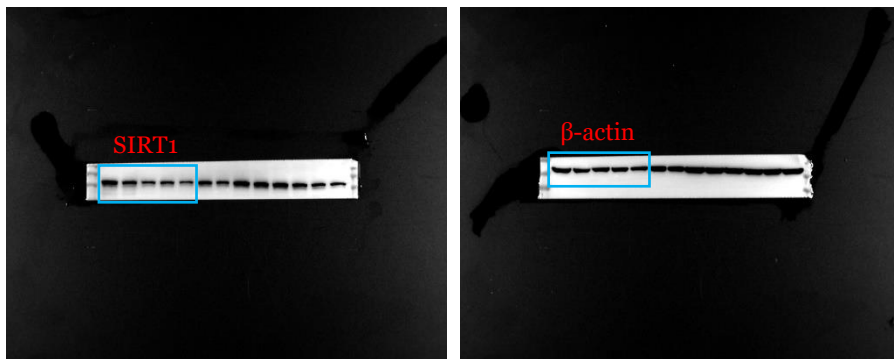

**Figure 6.A**

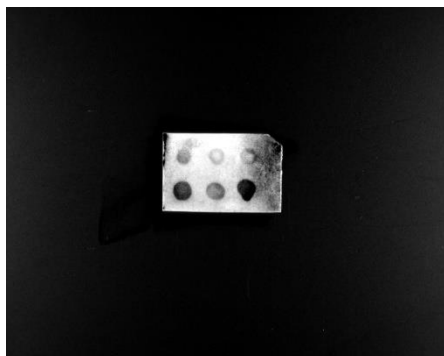

**Figure 6.C**

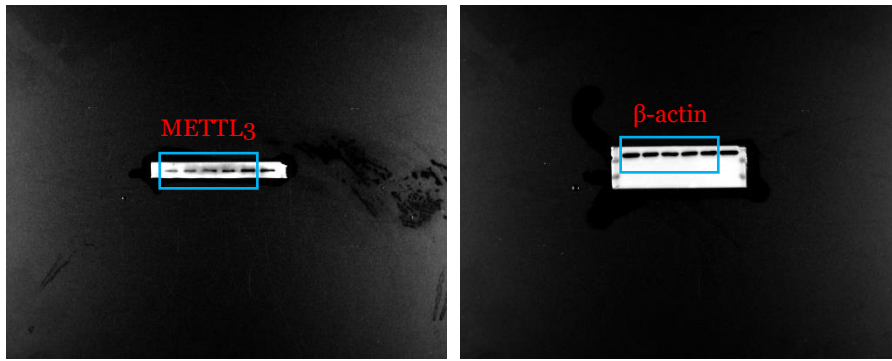

**Figure 6.D**

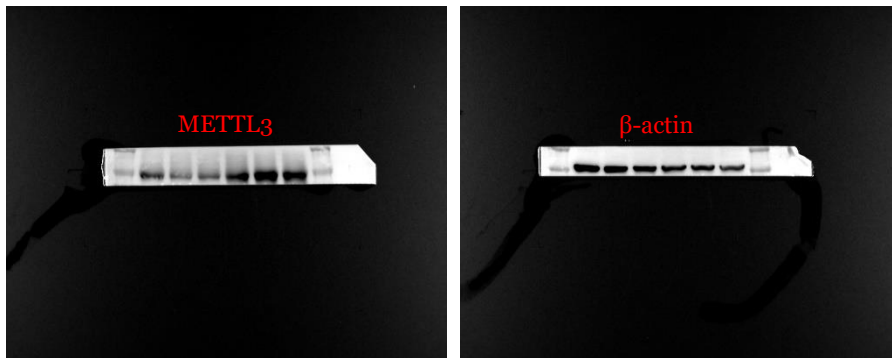

**Figure 6.E**

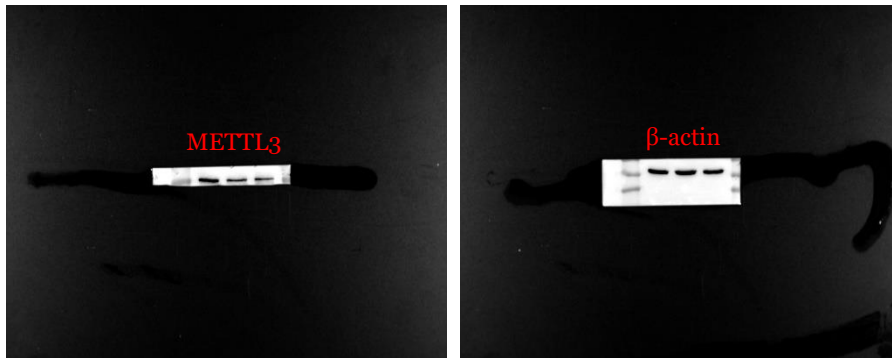

**Figure 6.F**

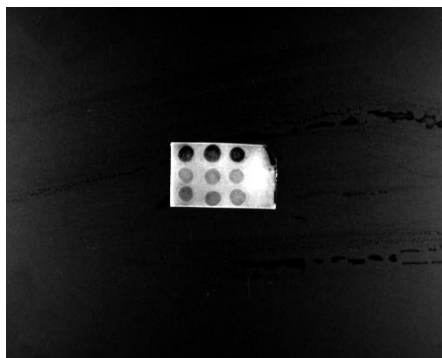

**Figure 7.B**

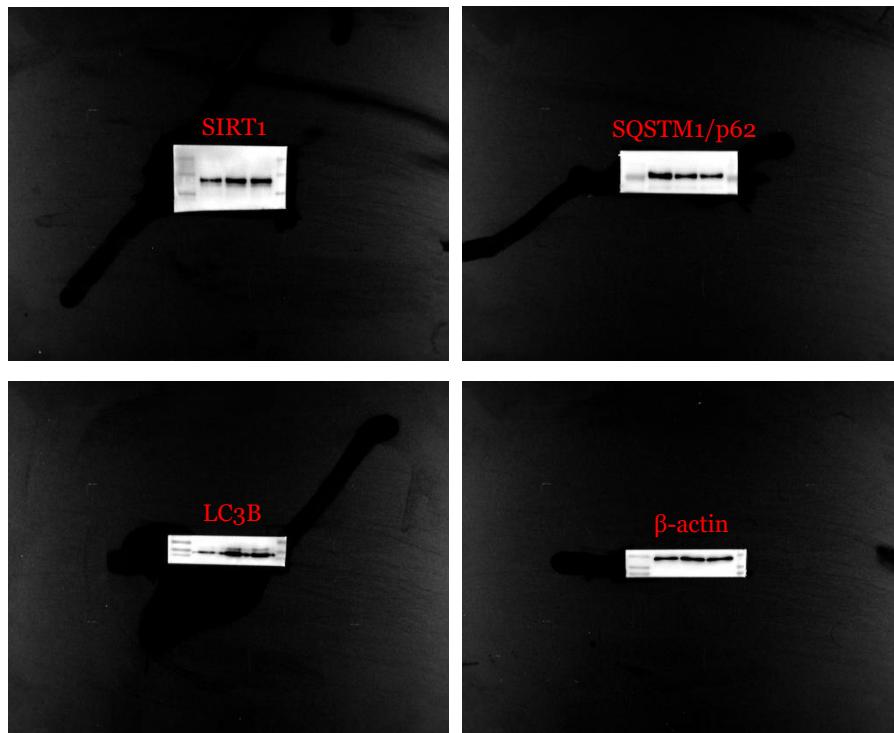

Supplement: 41420_2022_1166_MOESM6_ESM.pdf [file 41420_2022_1166_MOESM6_ESM.pdf]
